# Supplementary material
Source: MDPI journal article supplement (https://www.mdpi.com/2073-4433/12/9/1111)
Supplement: s1 [file s1]

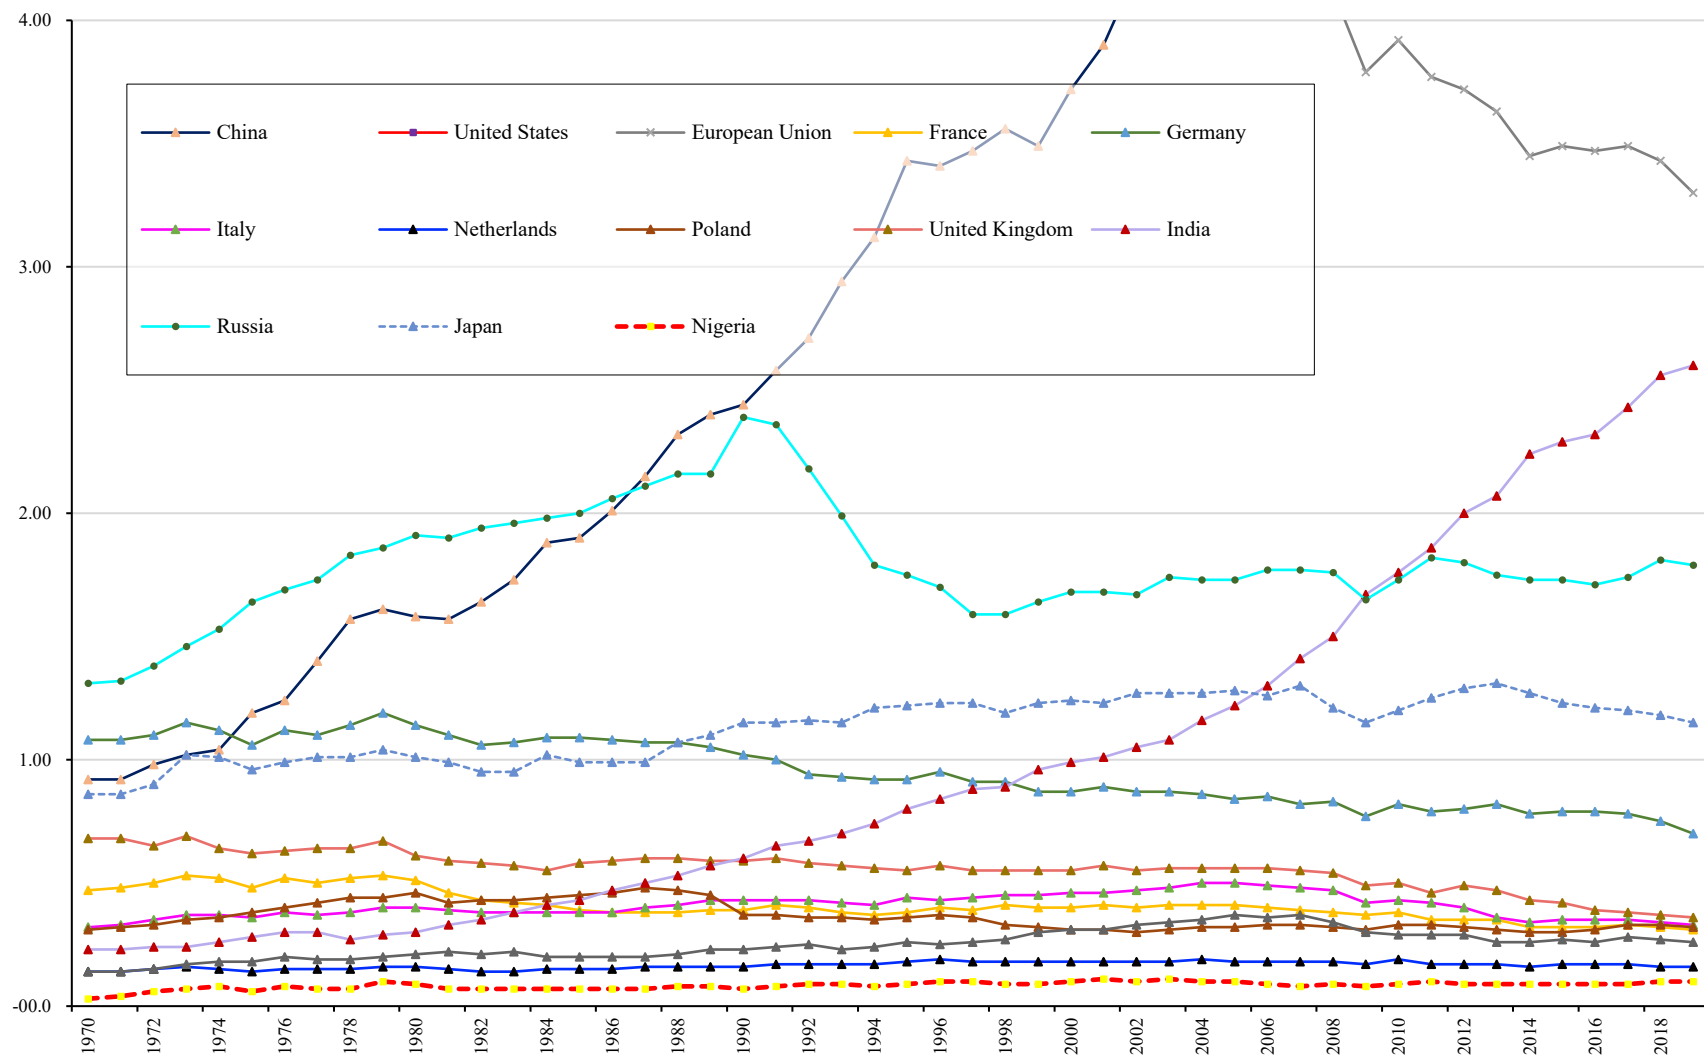

**Figure S1:** Carbon-dioxide (CO<sub>2</sub>) emissions from 1970 to 2019 in Nigeria and other countries

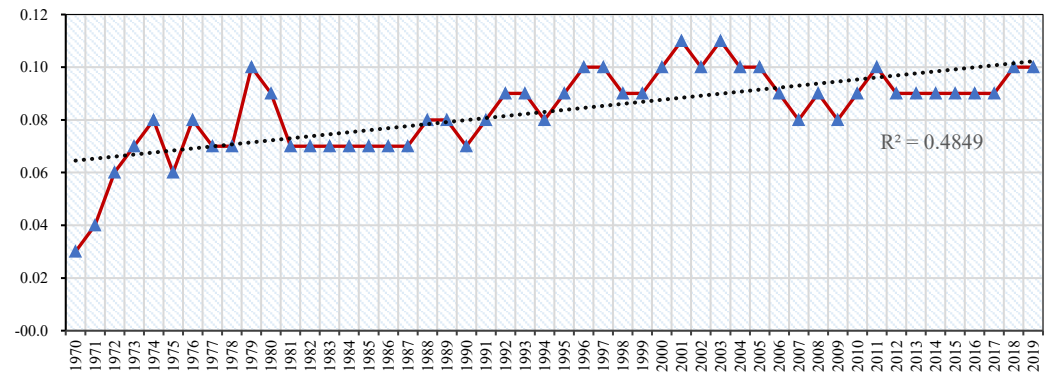

**Figure S2:** Carbon-dioxide (CO<sub>2</sub>) emissions from 1970 to 2019 in Nigeria [22]

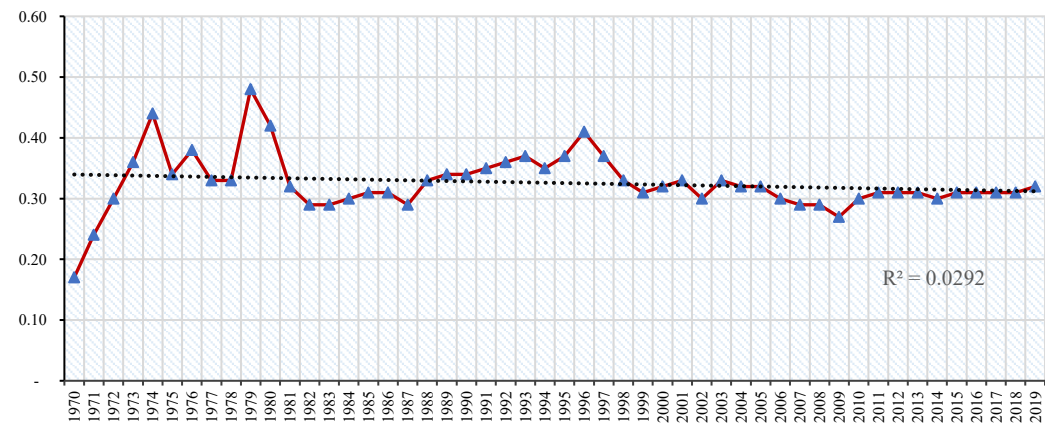

**Figure S3:** Methane (CH<sub>4</sub>) emissions from 1970 to 2019 in Nigeria [22]

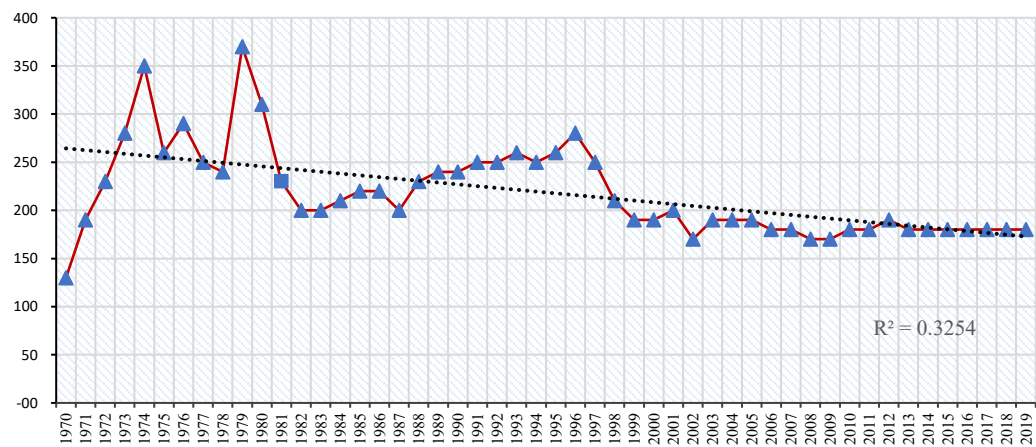

**Figure S4:** Nitrous Oxide Emissions (N<sub>2</sub>O) from 1970 to 2019 in Nigeria [22]

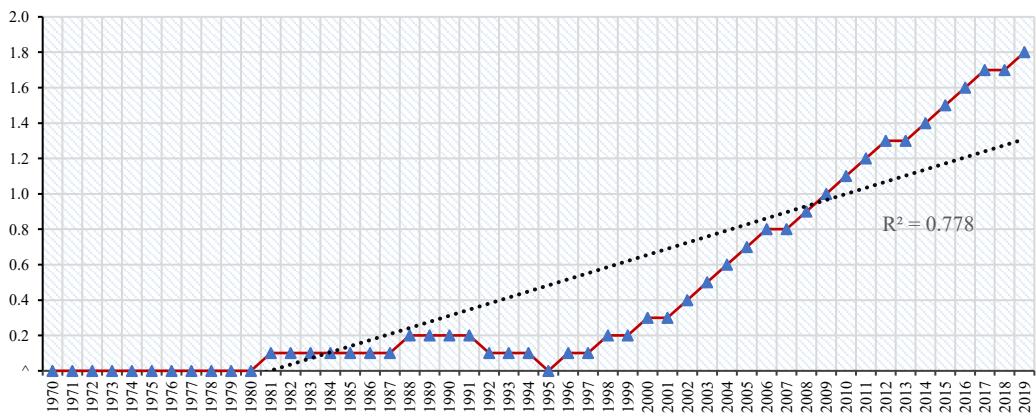

**Figure S5:** Fluorinated Greenhouse Gases (F-gases): HFCs, PFCs and SF<sub>6</sub> Emission in Nigeria [22]
